# Supplementary material
Source: publisher figshare collection journal article supplement (https://acs.figshare.com/ndownloader/files/10213683)
Supplement: Supplementary file 1 [file 10213683]

**Surface Modification of Basalt Fiber with Organic/Inorganic Composites for  
Biofilm Carrier Used in Wastewater Treatment**

Xiaoying Zhang<sup>a</sup>, Xiangtong Zhou<sup>a\*</sup>, Huicheng Ni<sup>a</sup>, Xinshan Rong<sup>a</sup>, Qian Zhang<sup>a</sup>, Xiang Xiao<sup>a</sup>,  
Huan Huan<sup>b</sup>, Jun Feng Liu<sup>c</sup>, Zhiren Wu<sup>a\*</sup>

<sup>a</sup> School of the Environment and Safety Engineering, Jiangsu University, No. 301

Xuefu Road, Jingkou District, Zhenjiang 212013, China

<sup>b</sup> State Environmental Protection Key Laboratory of Simulation and Control of  
Groundwater Pollution, Chinese Research Academy of Environmental Sciences, No.8

Dayangfang, Anwai Beiyuan, Chaoyang District, Beijing 100012, China

<sup>c</sup> School of Environment, Harbin Institute of Technology, No. 73 Huanghe Road,

Nangang District, Harbin 150090, China

Number of pages: 5

Number of figures: 2

Number of Tables: 2

**Table of contents:**

|                                                                                         |      |
|-----------------------------------------------------------------------------------------|------|
| 1. Synthetic route of polyacrylamide/epoxy/nano-SiO <sub>2</sub> coating                | Page |
| S2                                                                                      |      |
| 2. The recipe for the preparation of polyacrylamide/epoxy/nano-SiO <sub>2</sub> coating | Page |
| S3                                                                                      |      |
| 3. Water contact angle data of BF and MBF                                               | Page |
| S4                                                                                      |      |
| 4. Pictures of BF and MBF after microorganism immobilization tests                      | Page |
| S5                                                                                      |      |

\*Corresponding authors:

E-mail: [wuzhiren@ujes.edu.cn](mailto:wuzhiren@ujes.edu.cn) (Zhiren Wu); [xtzhou@ujes.edu.cn](mailto:xtzhou@ujes.edu.cn) (Xiangtong Zhou)

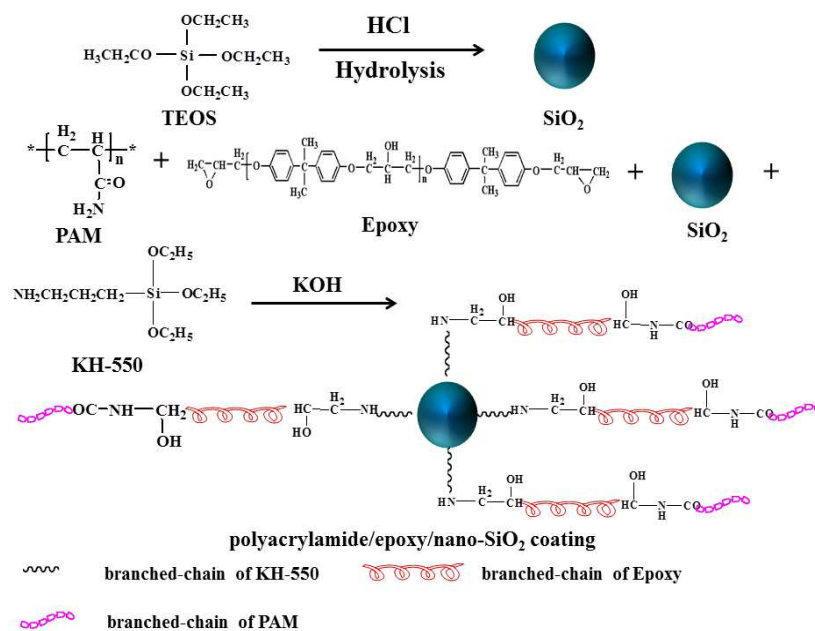

Figure S1 Synthetic route of polyacrylamide/epoxy/nano-SiO<sub>2</sub> coating

Table S1 The recipe for the preparation of polyacrylamide/epoxy/nano-SiO<sub>2</sub> coating

| Sample                                                 | Nano-SiO <sub>2</sub><br>(g) | KH-550<br>(g) | PAM<br>(g) | HTMAC<br>(g) | Epoxy<br>(g) | KPS<br>(g) | H <sub>2</sub> O<br>(g) |
|--------------------------------------------------------|------------------------------|---------------|------------|--------------|--------------|------------|-------------------------|
| polyacrylamide/epoxy<br>/nano-SiO <sub>2</sub> coating | 3.00                         | 0.24          | 0.30       | 0.13         | 16.27        | 0.08       | 64.99                   |

Table S2 Water contact angle data of BF and MBF samples

| Sample      | Water contact angle data |
|-------------|--------------------------|
| BF (0 s)    | 159.246                  |
| BF (50 s)   | 157.816                  |
| BF (100 s)  | 155.768                  |
| BF (150 s)  | 154.984                  |
| MBF (0 s)   | 44.068                   |
| MBF (50 s)  | 36.319                   |
| MBF (100 s) | 22.546                   |
| MBF (150 s) | 1.592                    |

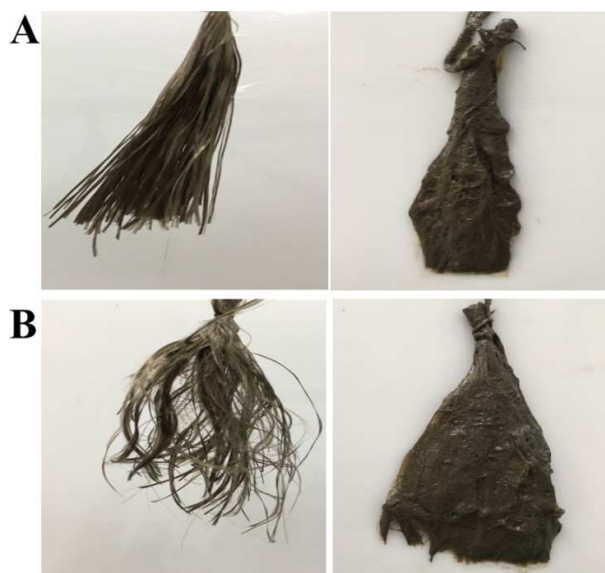

Figure S2 Pictures of BF (A) and MBF (B) before and after microorganism immobilization tests
